# Supplementary material for: Early intervention, treatment and rehabilitation of employees with common mental disorders by using psychotherapeutic consultation at work: study protocol of a randomised controlled multicentre trial (friaa project)
Source: Springer Nature journal article supplement (doi:10.1186/s12889-021-11195-9), 2021-06-22
Supplement: MOESM1 [file 19283454]

**Additional file 1** Study questionnaire for sociodemographic variables and days of sickness absence

**Personal details**

1. Sex            1  male            2  female            3  divers

2. Age    \_\_\_\_\_ years

3. Marital status  
(please tick only one box)    1  married/ in permanent relationship    2  single    3  divorced    4  widowed

**Occupational details**

4. a) What best describes your current employment situation?  
(please tick only one box)

- 1  Employed fulltime or parttime
- 2  trainee
- 3  voluntary work (without payment)
- 4  protected activity

4. b) If 4.a is not applicable: What best describes your social situation?  
(please tick only one box)

- 5  unemployed/seeking employment since \_\_\_\_\_
- 6  Student
- 7  Homemaker
- 8  Pension (including early retirement)
- 9  occupational disability since \_\_\_\_\_
- 10  maternity or paternal leave or other leave of absence
- 11  other, namely \_\_\_\_\_

4. c) If employed, for how many hours are you working?

fulltime, hours/week: \_\_\_\_\_  
part-time, hours/week: \_\_\_\_\_

4. d) For how many days per week are you working?

days/weeks: \_\_\_\_\_

5. Are you doing shiftwork?

- 1  no
- 2  yes including night work

3  yes without night work

**6. How long have you been working?**

Since |\_|\_| years or since the years  
|\_|\_|\_|

**7. Which professional group do you currently belong to (please tick only one box)?**

- 1  Unskilled work
- 2  Skilled worker
- 3  Foremen
- 4  Self-employed
- 5  Executing employee (e.g. secretary)
- 6  Mid-level employee (e.g. clerk, assistant)
- 7  Senior/executive employee (e.g. department head, team leader)
- 8  Executing civil servant (e.g. secretary)
- 9  Mid-level civil servant (e.g. teacher)
- 10  Senior/executive civil servant (e.g. department head)
- 11  Other: \_\_\_\_\_

**8. Do you have a management position?**

- 1  no
- 2  yes  
If yes, for how many employees are you responsible for? Number: \_\_\_\_\_

**9. How big is the company you are working for (please only tick one box. If unknown, please tick what is most likely to apply)?**

- 1  Large-sized company (>1000 employees)
- 2  Large-sized company with less employees (about. 250-1000 employees)
- 3  Middle-sized company (about 50-249 employees)
- 4  Small-sized company (about 10-49 employees)
- 5  Microenterprise (about 2-9 employees)
- 6  One-man business

**10. Have you been absent from work for health reasons within the last 6 months?**

1  no

2  yes. If yes, number of days of sickness absence within the last six months

( excluding regular non-working days ): \_\_\_\_\_ (days)

**11. How do you envision your professional future? (Please tick all appropriate boxes)**

**I think that in the near future I will probably...**

still work in my profession.

apply for a pension/receive a pension.

not be able to work in my profession.

be unemployed.

search for another job.

be on sick leave.

not be able to work at all.

I don't know yet.

**12. Have you been on sick leave due to serious physical illnesses within the last 6 months?**

no

yes
